# Supplementary material for: Stimulus-specific adaptation to behaviorally-relevant sounds in awake rats
Source: PubMed Central journal article supplement (PMC7094827; doi:10.1371/journal.pone.0221541), 2020-03-25
Supplement: pone.0221541.s002.pdf [file pone.0221541.s002.pdf]

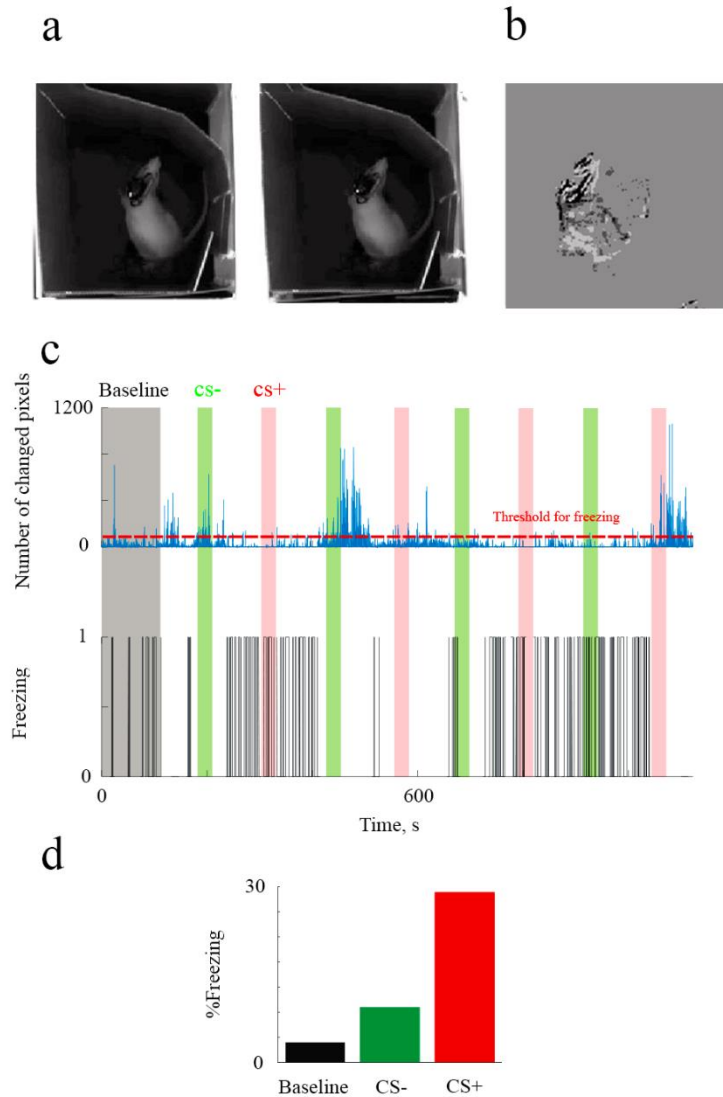

**Supplementary Figure 2. Detection of freezing.**

The algorithm used the video movie of the test episode. Starting from the individual frames (a), pairwise differences between successive frames were computed (b). The number of non-zero pixels was counted and smoothed. Panel c (blue) shows an example of such a smoothed trace. Freezing periods were determined by thresholding this trace (red line). Panel c (black) shows the resulting decisions. The fraction of time that freezing episodes occupied was determined separately for a baseline period (gray rectangle), for presentations of the CS+ (red) and for presentations of the CS- (green), as shown in panel d.
